# Supplementary material
Source: PubMed Central journal article supplement (PMC3141888)

DNA-PK and ATM promote cell survival in response to NK314, a topoisomerase II $\alpha$  inhibitor.  
Lei Guo, Xiaojun Liu, Yingjun Jiang, Kiyohiro Nishikawa and William Plunkett. MOLPHARM/2009/057125

**Supplemental Figure S2.** DNA-PKcs is the specific target of NU7441. M059J (A) and M059K (B) cells were treated with 0-200 nM NK314 in the absence or presence of 2  $\mu$ M NU7441 for 24 hours. Colonies were counted after 8 days. Each data point represents the mean  $\pm$  SEM of triplicate samples.

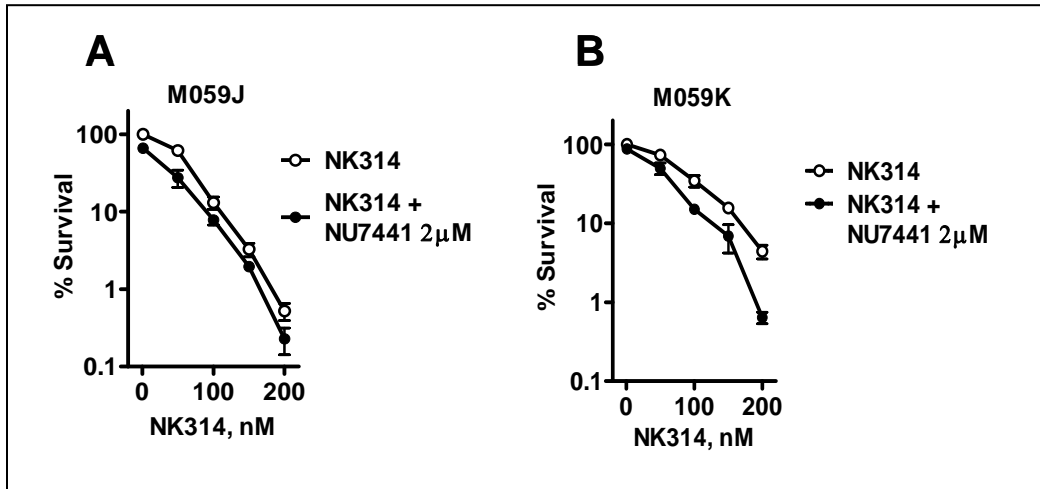

DNA-PK and ATM promote cell survival in response to NK314, a topoisomerase II $\alpha$  inhibitor.  
Lei Guo, Xiaojun Liu, Yingjun Jiang, Kiyohiro Nishikawa and William Plunkett. MOLPHARM/2009/057125

**Supplemental Figure S3.** Specificity of the ATM inhibitor KU55933. HCT116 and OCI-AML3 cells were pretreated with KU55933 (10  $\mu$ M) for 1 hour before incubation with (A) NK314 (50 nM and 100 nM, respectively) or (B)  $\gamma$ -irradiation (10 Gy). Cells were harvested 24 hours after addition of NK314 or 1 hour post irradiation. Cells lysates were subjected to isolation by SDS-PAGE, followed by transferring on to nitrocellulose membranes. Target proteins were detected by immunoblotting with indicated antibodies.

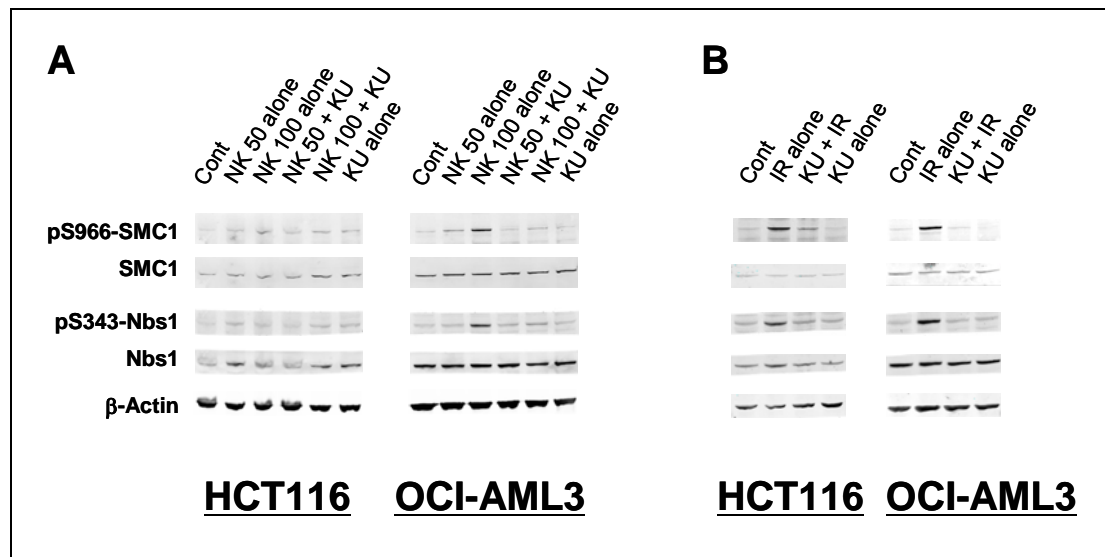

Supplement: supp_mol.109.057125_Supplemental_file_FINAL.pdf [file supp_mol.109.057125_Supplemental_file_FINAL.pdf]
